# Supplementary material for: A critical role of hippocampus for formation of remote cued fear memory
Source: PubMed Central journal article supplement (PMC7429722; doi:10.1186/s13041-020-00652-y), 2020-08-15

**Additional Fig. 1** Schematic illustrations of injection cannula placements in mice used for behavior experiments. Related to Fig. 1, 2.

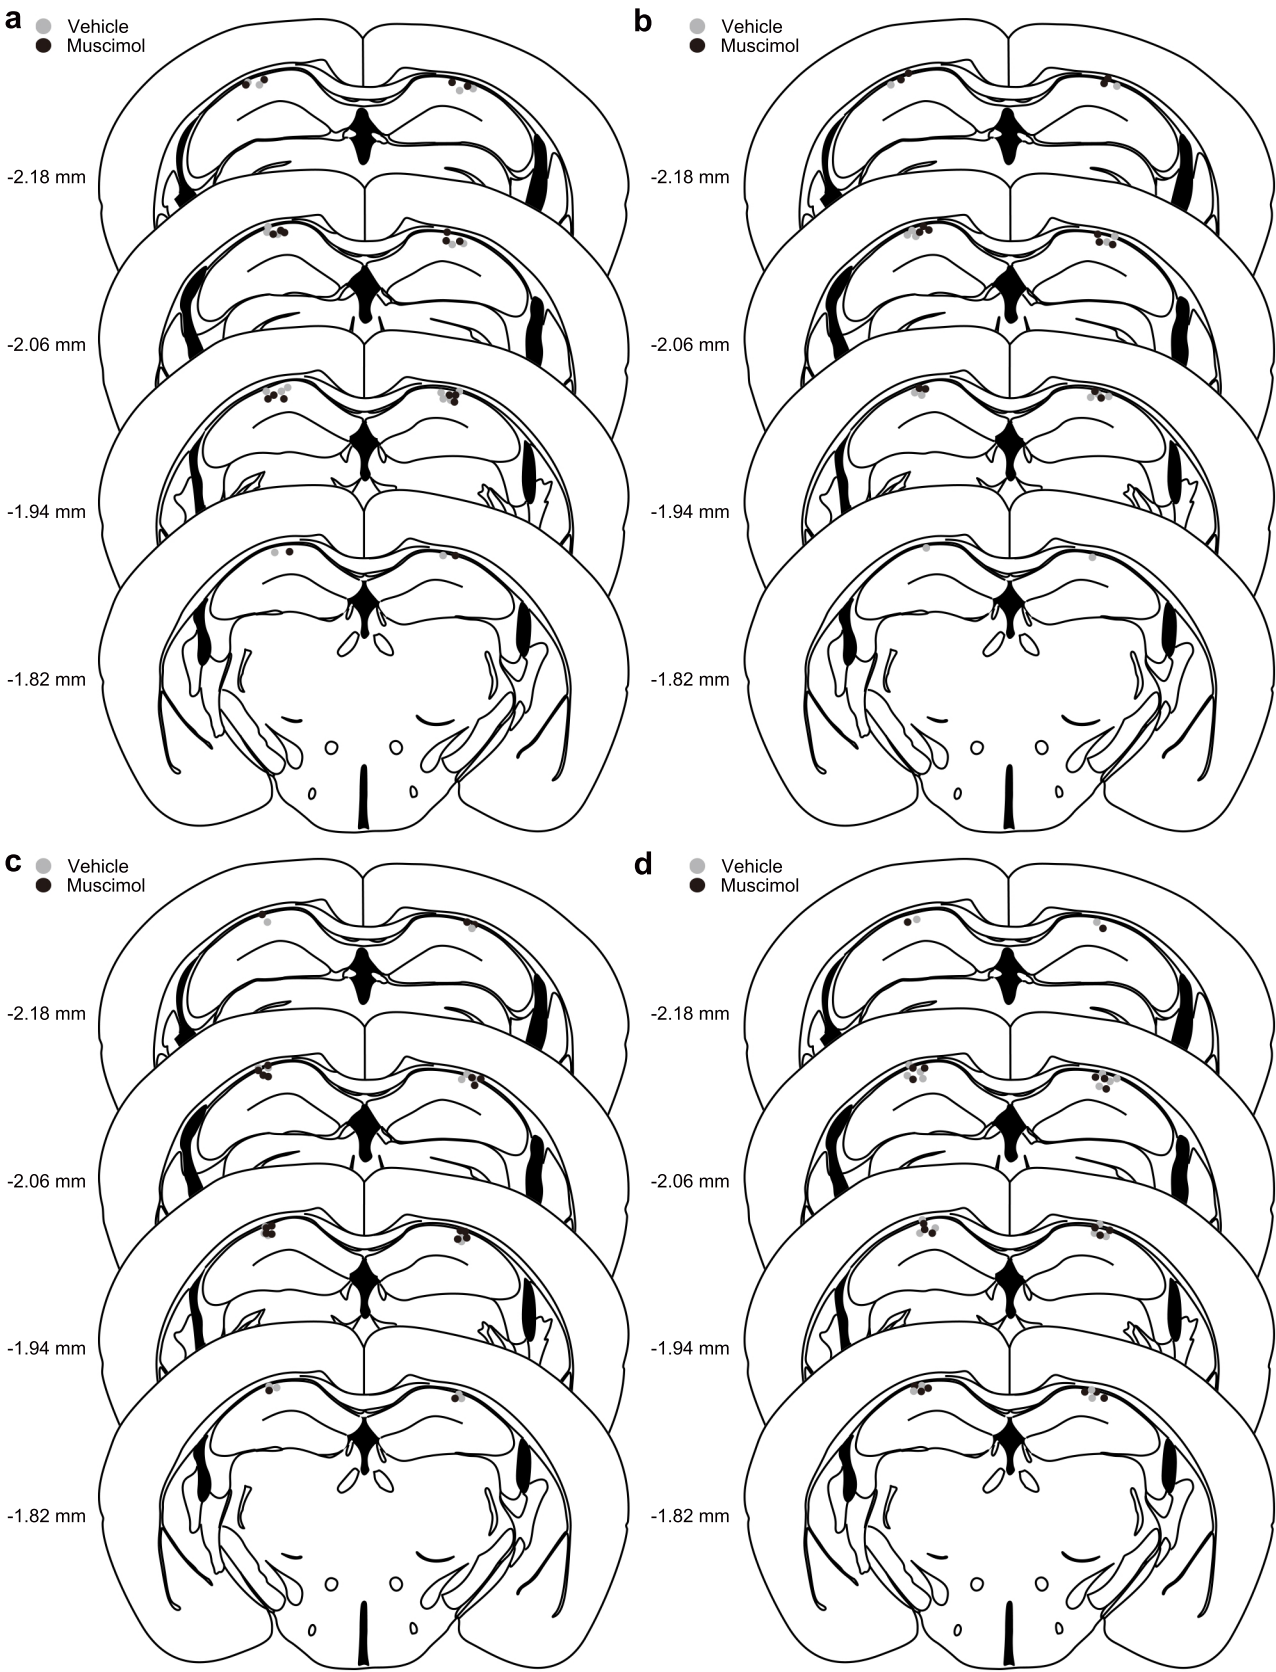

Supplement: 13041_2020_652_MOESM1_ESM.pdf [file 13041_2020_652_MOESM1_ESM.pdf]
